# Supplementary material
Source: MDPI journal article supplement (https://www.mdpi.com/2076-3417/11/23/11526)
Supplement: s1 [file s1]

# Supplementary Materials: Evaluation of *In Vitro* Wound-Healing Potential, Antioxidant Capacity, and Antimicrobial Activity of *Stellaria media* (L.) Vill

Florina Miere (Groza), Alin Cristian Teuşdea, Vasile Laslo, Simona Cavalu, Luminiţa Fritea, Luciana Dobjanschi, Mihaela Zdrânca, Marcel Zdrânca, Mariana Ganea, Priscilla Paşc, Adriana Ramona Memete, Angela Antonescu, Andreea Margareta Vlad and Simona Ioana Vicas

**Table S1.** Effect of SM extract (12.5–200 µg/mL) on the migratory and proliferative activity of fibroblasts, expressed as width of the wound in the scratch assay after 0, 12, 24, 36, and 48 h (T00, T12, T24, T36, and T48, respectively). CTRL means positive control—50µg/mL Allantoin, CTRL0 means control, (untreated wound), C200 means treatment with 200 µg/mL SM extract, C100 means treatment with 100 µg/mL SM extract, C50 means treatment with 50 µg/mL SM extract, C25 means treatment with 25 µg/mL SM extract, C12.5 means treatment with 12.5 µg/mL SM extract. Data are expressed as relative ratio of cell numbers in the wounded width compared to the control for the analyzed samples (mean ± standard deviation, N = 3). Results are presented for the Sample factor \* Time from bivariate analysis (ANOVA).

| Wound coverage,<br>Relative width (%) | C200               | C100                | C50                | C25                | C12.5              | CTRL               | CTRL0              |
|---------------------------------------|--------------------|---------------------|--------------------|--------------------|--------------------|--------------------|--------------------|
| T00                                   | 0.00d<br>± 0.000   | 0.00d<br>± 0.000    | 0.00d<br>± 0.000   | 0.00d<br>± 0.000   | 0.00d<br>± 0.000   | 0.00d<br>± 0.000   | 0.00d<br>± 0.000   |
| T12                                   | 48.83b<br>± 11.362 | 40.36bc<br>± 14.039 | 39.86bc<br>± 9.336 | 47.09b<br>± 0.349  | 30.69bc<br>± 5.152 | 36.83bc<br>± 9.074 | 19.60c<br>± 4.949  |
| T24                                   | 100.00a<br>± 0.000 | 100.00a<br>± 0.000  | 100.00a<br>± 0.000 | 80.57a<br>± 19.432 | 100.00a<br>± 0.000 | 78.86a<br>± 21.141 | 24.17c<br>± 3.474  |
| T36                                   | 100.00a<br>± 0.000 | 100.00a<br>± 0.000  | 100.00a<br>± 0.000 | 100.00a<br>± 0.000 | 100.00a<br>± 0.000 | 91.80a<br>± 8.196  | 100.00a<br>± 0.000 |
| T48                                   | 100.00a<br>± 0.000 | 100.00a<br>± 0.000  | 100.00a<br>± 0.000 | 100.00a<br>± 0.000 | 100.00a<br>± 0.000 | 100.00a<br>± 0.000 | 100.00a<br>± 0.000 |

Note: The different letters that accompany the mean values denote statistically significantly different mean values; these results come from the multiple comparison of the means with the Duncan test (P = 0.05) performed post hoc bivariate analysis of variance (ANOVA) (P = 0.05).

**Table S2.** Effect of SM extract (12.5–200 µg/mL) on the migratory and proliferative activity of fibroblasts, expressed as area of the wound in the scratch assay after 0, 12, 24, 36, and 48 h (T00, T12, T24, T36, and T48, respectively). CTRL means positive control—Allantoin 50µg/mL, and CTRL0 means control (untreated wound), C200 means treatment with 200 µg/mL SM extract, C100 means treatment with 100 µg/mL SM extract, C50 means treatment with 50 µg/mL SM extract, C25 means treatment with 25 µg/mL SM extract, C12.5 means treatment with 12.5 µg/mL SM extract. Data are expressed as the area of the wound compared to the control for the analyzed samples (mean ± standard deviation, N = 3). Results are presented for the Sample factor \* Time from bivariate analysis (ANOVA).

| Wound coverage,<br>Area (%) | C200               | C100                | C50                | C25                 | C12.5              | CTRL               | CTRL0              |
|-----------------------------|--------------------|---------------------|--------------------|---------------------|--------------------|--------------------|--------------------|
| T00                         | 0.00f<br>± 0.000   | 0.00f<br>± 0.000    | 0.00f<br>± 0.000   | 0.00f<br>± 0.000    | 0.00f<br>± 0.000   | 0.00f<br>± 0.000   | 0.00f<br>± 0.000   |
| T12                         | 50.54c<br>± 14.643 | 38.21cd<br>± 15.277 | 40.58cd<br>± 8.072 | 46.05c<br>± 0.321   | 31.52cd<br>± 5.180 | 37.02cd<br>± 9.002 | 10.41ef<br>± 0.920 |
| T24                         | 98.07a<br>± 0.133  | 95.00ab<br>± 3.799  | 99.75a<br>± 0.091  | 81.09ab<br>± 18.833 | 96.07ab<br>± 1.997 | 74.19b<br>± 20.123 | 23.36de<br>± 2.867 |
| T36                         | 98.65a<br>± 1.350  | 98.46a<br>± 1.295   | 99.39a<br>± 0.357  | 93.04ab<br>± 6.609  | 95.37ab<br>± 4.581 | 91.68ab<br>± 7.210 | 91.44ab<br>± 0.475 |
| T48                         | 99.87a<br>± 0.025  | 98.67a<br>± 1.179   | 99.53a<br>± 0.350  | 97.56a<br>± 2.387   | 98.49a<br>± 1.337  | 96.84a<br>± 3.148  | 92.55ab<br>± 0.222 |

Note: The different letters that accompany the mean values denote statistically significantly different mean values; these results come from the multiple comparison of the means with the Duncan test (P = 0.05) performed post hoc bivariate analysis of variance (ANOVA) (P = 0.05).

**Table S3.** Effect of SM extract (12.5–200  $\mu\text{g/mL}$ ) on the migratory and proliferative activity of fibroblasts, expressed as normalized density of cells of the wound in the scratch assay after 0, 12, 24, 36, and 48 h (T00, T12, T24, T36, and T48, respectively). CTRL means positive control—Allantoin 50 $\mu\text{g/mL}$ , and CTRL0 means control (untreated wound), C200 means treatment with 200  $\mu\text{g/mL}$  SM extract, C100 means treatment with 100  $\mu\text{g/mL}$  SM extract, C50 means treatment with 50  $\mu\text{g/mL}$  SM extract, C25 means treatment with 25  $\mu\text{g/mL}$  SM extract, C12.5 means treatment with 12.5  $\mu\text{g/mL}$  SM extract. Data are expressed as normalized density of cells in the wound compared to the control for the analyzed samples (mean  $\pm$  standard deviation, N = 3). Results are presented for the Sample factor \* Time from bivariate analysis (ANOVA).

| Normalize Density<br>of Cells (%) | C200                     | C100                     | C50                     | C25                       | C12.5                   | CTRL                    | CTRL0                   |
|-----------------------------------|--------------------------|--------------------------|-------------------------|---------------------------|-------------------------|-------------------------|-------------------------|
| <b>T00</b>                        | 0.00i<br>$\pm$ 0.000     | 0.00i<br>$\pm$ 0.000     | 0.00i<br>$\pm$ 0.000    | 0.00i<br>$\pm$ 0.000      | 0.00i<br>$\pm$ 0.000    | 0.00i<br>$\pm$ 0.000    | 0.00i<br>$\pm$ 0.000    |
| <b>T12</b>                        | 57.10def<br>$\pm$ 14.986 | 53.97def<br>$\pm$ 15.154 | 38.31fgh<br>$\pm$ 5.421 | 58.13def<br>$\pm$ 3.333   | 32.42fgh<br>$\pm$ 8.072 | 36.84fgh<br>$\pm$ 5.181 | 8.93hi<br>$\pm$ 0.231   |
| <b>T24</b>                        | 85.34bcd<br>$\pm$ 9.294  | 132.03a<br>$\pm$ 9.617   | 113.17ab<br>$\pm$ 3.309 | 102.78abc<br>$\pm$ 32.427 | 82.78bcd<br>$\pm$ 7.751 | 57.69def<br>$\pm$ 3.107 | 14.97ghi<br>$\pm$ 0.057 |
| <b>T36</b>                        | 101.88abc<br>$\pm$ 0.743 | 128.88a<br>$\pm$ 13.043  | 112.40ab<br>$\pm$ 2.491 | 111.59ab<br>$\pm$ 24.136  | 91.16bc<br>$\pm$ 13.346 | 73.18cde<br>$\pm$ 7.901 | 43.36efg<br>$\pm$ 0.621 |
| <b>T48</b>                        | 115.74ab<br>$\pm$ 0.064  | 131.35a<br>$\pm$ 0.504   | 114.10ab<br>$\pm$ 3.556 | 116.11ab<br>$\pm$ 14.584  | 94.45bc<br>$\pm$ 11.783 | 85.68bcd<br>$\pm$ 8.963 | 55.85def<br>$\pm$ 1.966 |

Note: The different letters that accompany the mean values denote statistically significantly different mean values; these results come from the multiple comparison of the means with the Duncan test ( $P = 0.05$ ) performed post hoc bivariate analysis of variance (ANOVA) ( $P = 0.05$ ).
